# Supplementary material for: Sensitivity of potential evaporation estimates to 100 years of climate variability
Source: Copernicus journal article supplement (doi:10.5194/hess-19-997-2015), 2015-02-24
Supplement: Supplementary file 1 [file hess-19-997-2015-supplement.zip]

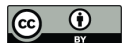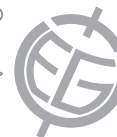

## *Supplement of*

# **Sensitivity of potential evaporation estimates to 100 years of climate variability**

**R. P. Bartholomeus et al.**

*Correspondence to:* R. P. Bartholomeus ([ruud.bartholomeus@kwrwater.nl](mailto:ruud.bartholomeus@kwrwater.nl))

- [hess-19-997-2015-supplement-cover-letter.pdf](#)
- supplementary material
  - [NatureForestDecid.crp](#)
  - [NatureForestPine.crp](#)
  - [NatureForestSpruce.crp](#)
  - [NatureGrass.crp](#)
  - [NatureHeather.crp](#)
